# Supplementary material for: Triazole-based novel bis Schiff base colorimetric and fluorescent turn-on dual chemosensor for Cu2+ and Pb2+: application to living cell imaging and molecular logic gates
Source: Royal Society of Chemistry journal article supplement (doi:10.1039/c9ra03341f), 2019-01-01
Supplement: c9ra03341f1.pdf [file c9ra03341f1.pdf]

Supplementary Information

**Triazole-based novel *bis* Schiff base Colorimetric and Fluorescent *turn-on* dual Chemosensor for Cu<sup>2+</sup> and Pb<sup>2+</sup>: Application to living cell imaging and molecular logic gate**

**Kalyani Rout, Amit Kumar Manna, Meman Sahu, Jahangir Mondal, Sunil K. Singh, and Goutam K. Patra\***

**Department of Chemistry, Guru Ghasidas Vishwavidyalaya, Bilaspur (C.G)**

**Table of Contents**

| Sl.No. | Content                                                                                                                                          | Figure No. |
|--------|--------------------------------------------------------------------------------------------------------------------------------------------------|------------|
| 1.     | FTIR spectra of <b>L</b>                                                                                                                         | <b>S1</b>  |
| 2.     | <sup>1</sup> H-NMR spectra of <b>L</b>                                                                                                           | <b>S2</b>  |
| 3.     | <sup>13</sup> C-NMR spectra of <b>L</b>                                                                                                          | <b>S3</b>  |
| 4.     | Mass spectra of <b>L</b>                                                                                                                         | <b>S4</b>  |
| 5.     | FTIR spectra of <b>1</b>                                                                                                                         | <b>S5</b>  |
| 6.     | Mass spectra of <b>1</b>                                                                                                                         | <b>S6</b>  |
| 7.     | UV-Vis spectra of <b>1</b> and <b>2</b> in CH <sub>3</sub> CN                                                                                    | <b>S7</b>  |
| 8.     | Emission spectra of <b>1</b> and <b>2</b> in CH <sub>3</sub> CN                                                                                  | <b>S8</b>  |
| 9.     | FTIR spectra of <b>2</b>                                                                                                                         | <b>S9</b>  |
| 10.    | Mass spectra of <b>2</b>                                                                                                                         | <b>S10</b> |
| 11.    | Colorimetric detection limit of <b>L</b> for (a) Cu <sup>2+</sup> and (b) Pb <sup>2+</sup>                                                       | <b>S11</b> |
| 12.    | Fluorometric detection limit of <b>L</b> for (a) Cu <sup>2+</sup> and (b) Pb <sup>2+</sup>                                                       | <b>S12</b> |
| 13.    | Job's plot for Cu <sup>2+</sup> and Pb <sup>2+</sup>                                                                                             | <b>S13</b> |
| 14.    | Mass spectra of <b>L</b> -Cu <sup>2+</sup> adduct                                                                                                | <b>S14</b> |
| 15.    | Mass spectra of <b>L</b> -Pb <sup>2+</sup> adduct                                                                                                | <b>S15</b> |
| 16.    | Association constant of <b>L</b> -Cu <sup>2+</sup> and <b>L</b> -Pb <sup>2+</sup> complexes                                                      | <b>S16</b> |
| 17.    | DFT optimised structures of <b>L</b> -Cu <sup>2+</sup> ( <b>1</b> ) and <b>L</b> -Pb <sup>2+</sup> ( <b>2</b> ) complexes                        | <b>S17</b> |
| 18.    | In aqueous bovine serum albumin medium-fluorescence spectra of <b>L</b> in presence of 5 equiv. of (a) Cu <sup>2+</sup> and (b) Pb <sup>2+</sup> | <b>S18</b> |

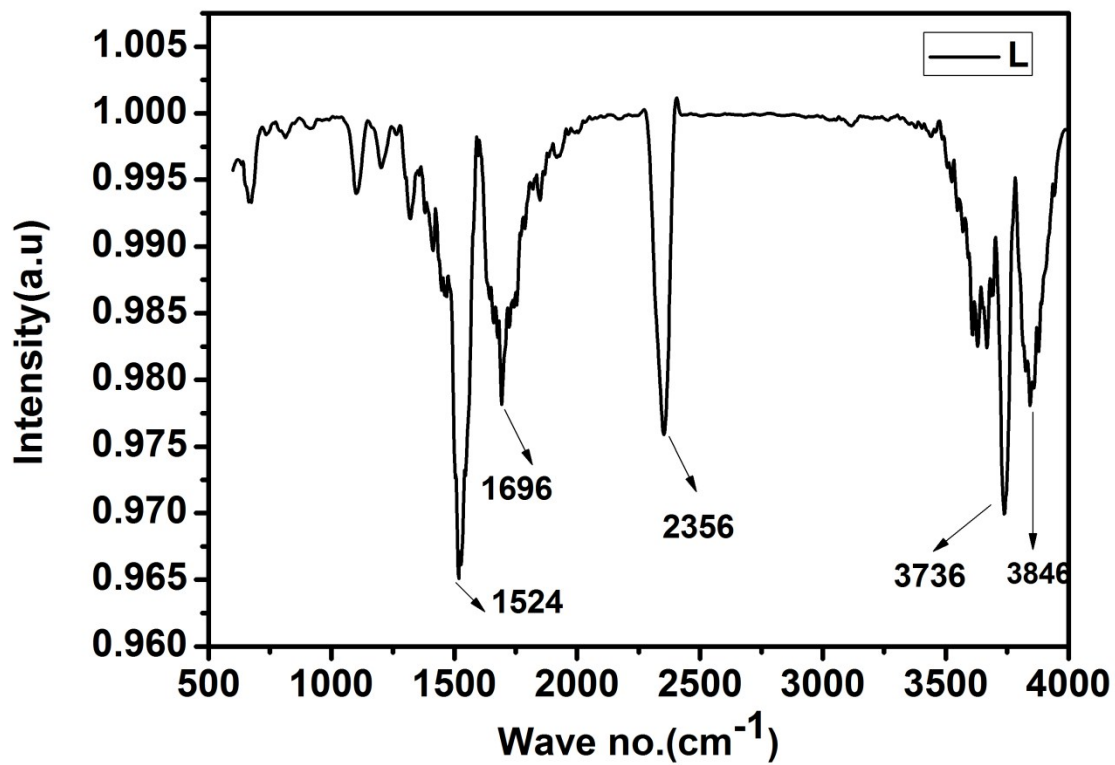

Fig. S1. FTIR spectra of L

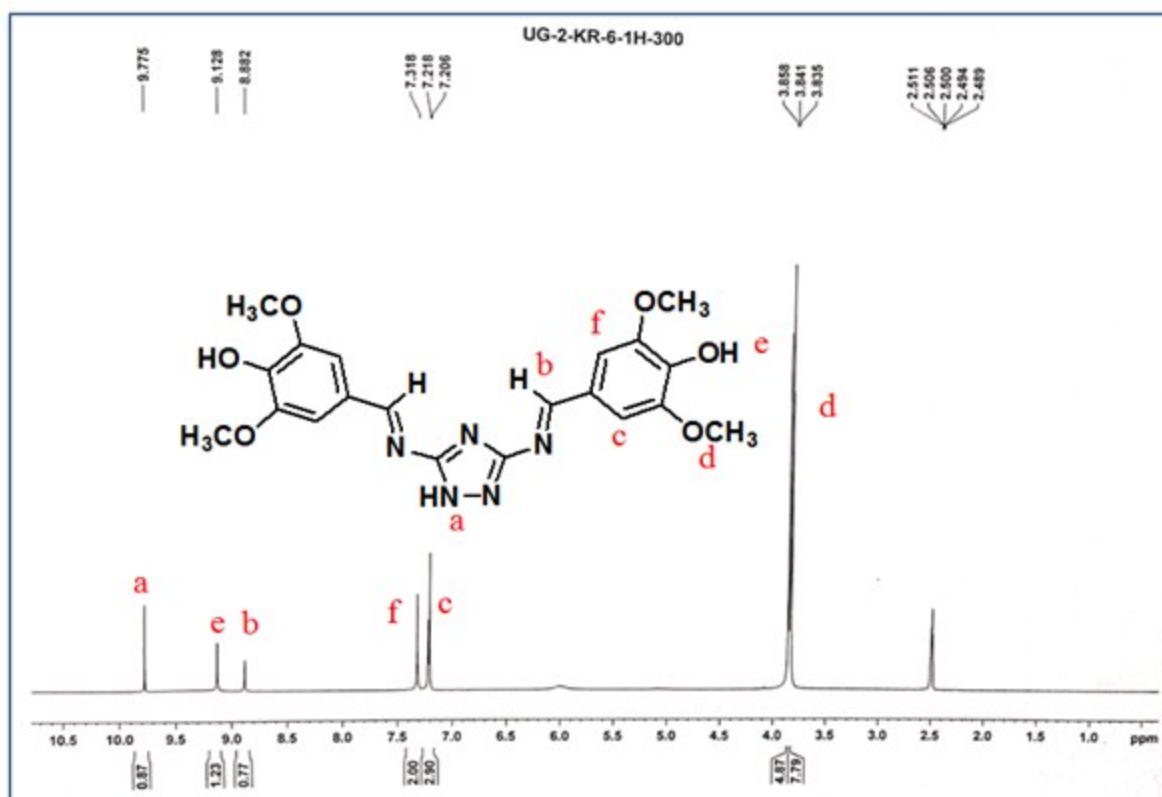

Fig. S2. <sup>1</sup>H NMR spectra of L in DMSO-d<sub>6</sub>.

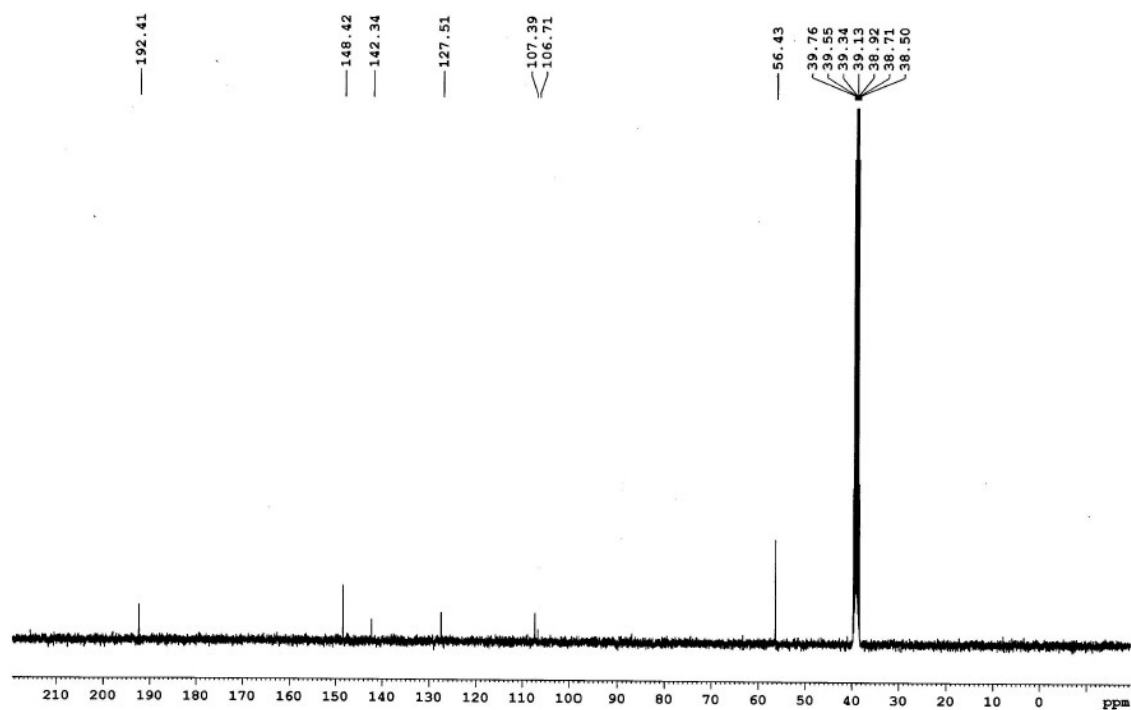

Fig. S3. <sup>13</sup>C NMR spectra of L in DMSO-d<sub>6</sub>.

D:\User Data\Biological Chemistry\A Banerjee\ks 6\0\_J2\1\1SRef  
D:\User Methods\RP\_50-1500\_Da.par

IACS-Kolkata

Comment 1  
Comment 2

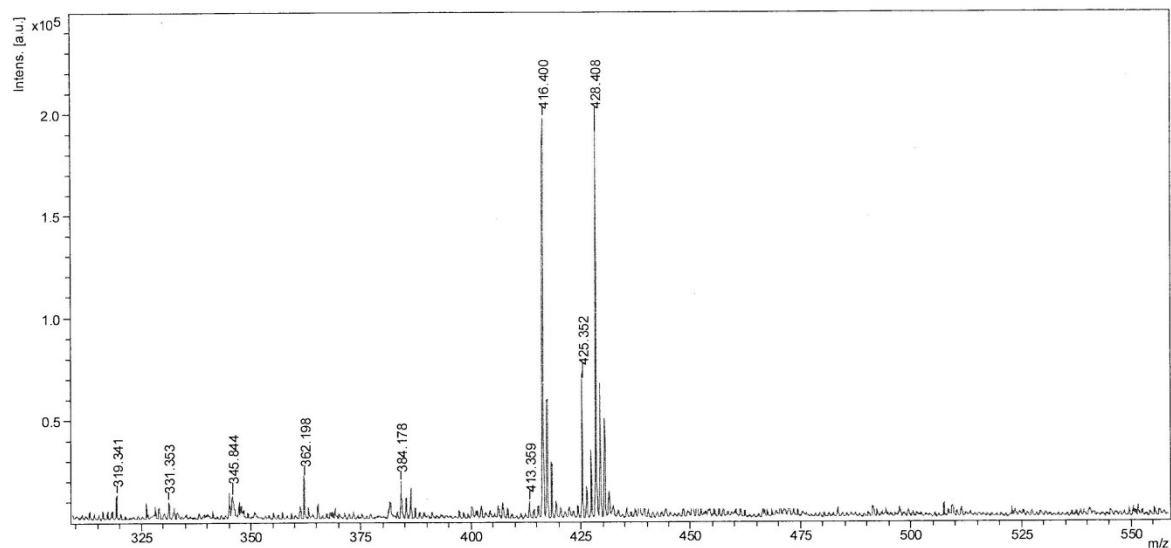

Bruker Daltonics flexAnalysis

printed: 11/26/2018 12:16:19 PM

Fig. S4. ESI-mass spectra of L.

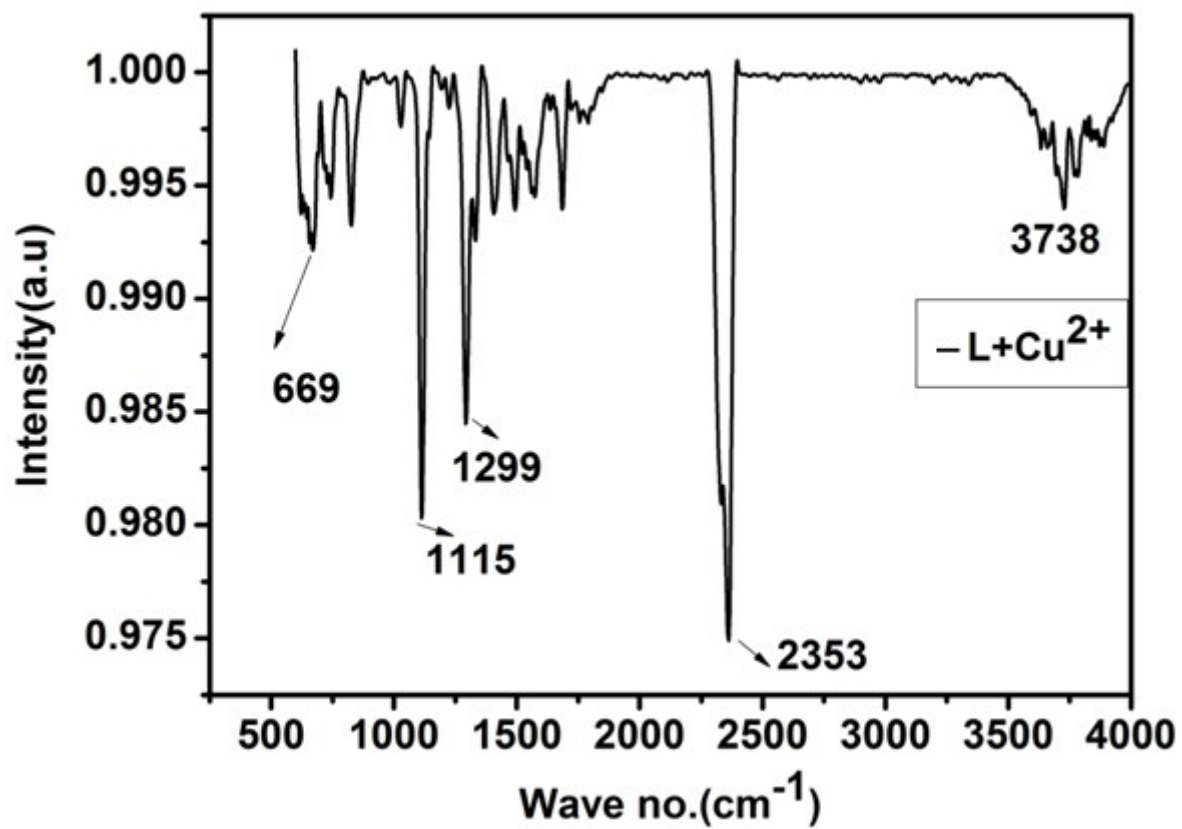

Fig. S5. FTIR spectra of L-Cu<sup>2+</sup> complex (1).

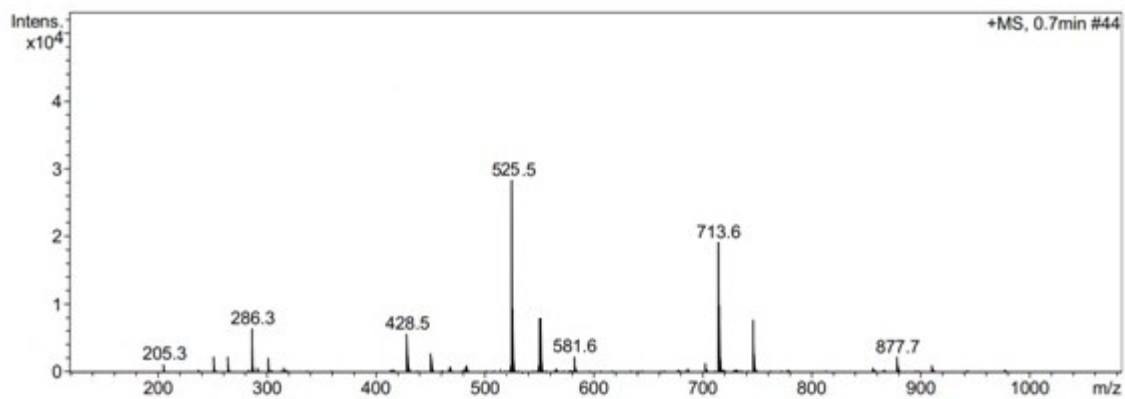

Fig. S6. ESI-mass spectra of L-Cu<sup>2+</sup> complex (1).

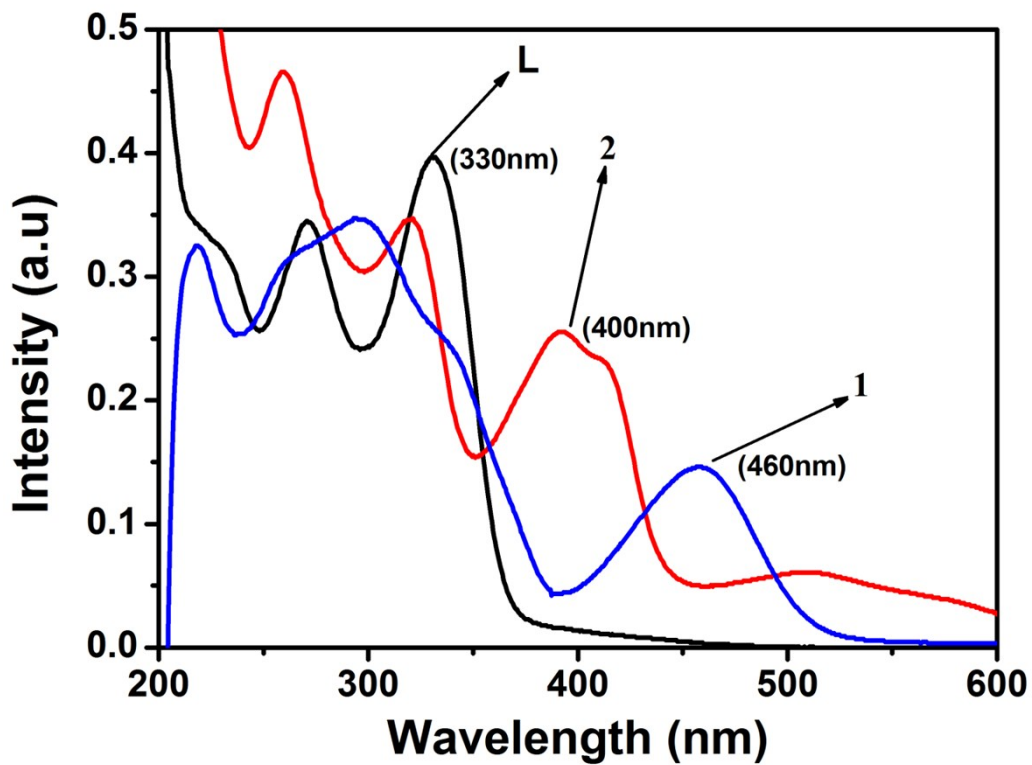

Fig. S7. UV-Vis spectra of L, L-Cu<sup>2+</sup> complex (1) and L-Pb<sup>2+</sup> complex (2).

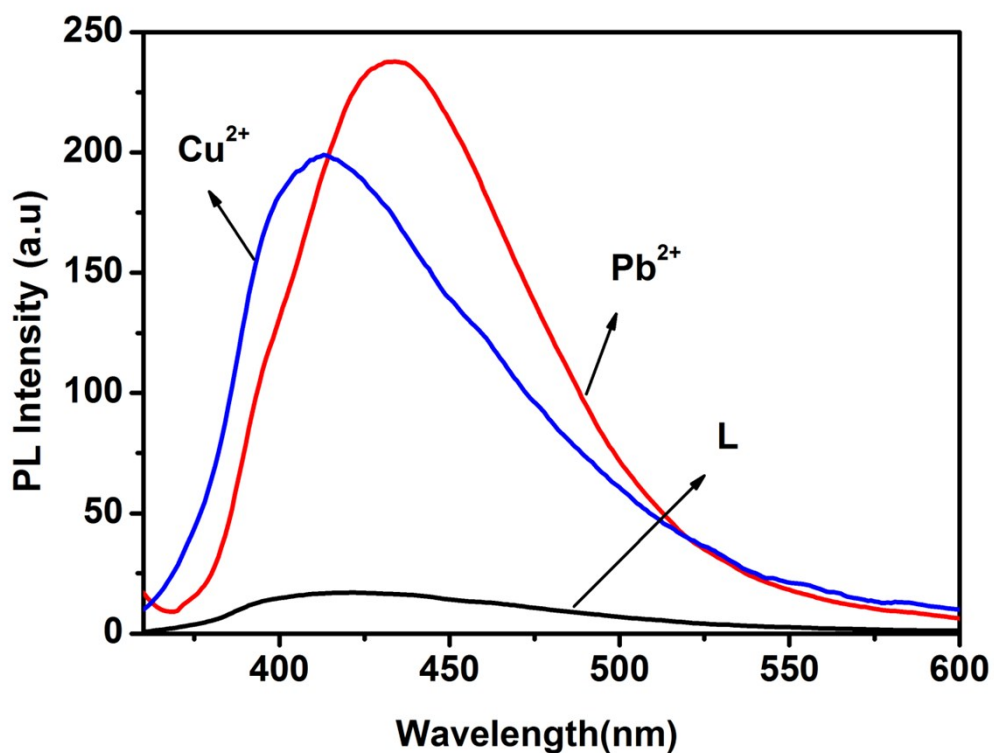

Fig. S8. Emission spectra of L, L-Cu<sup>2+</sup> complex (1) and L-Pb<sup>2+</sup> complex (2).

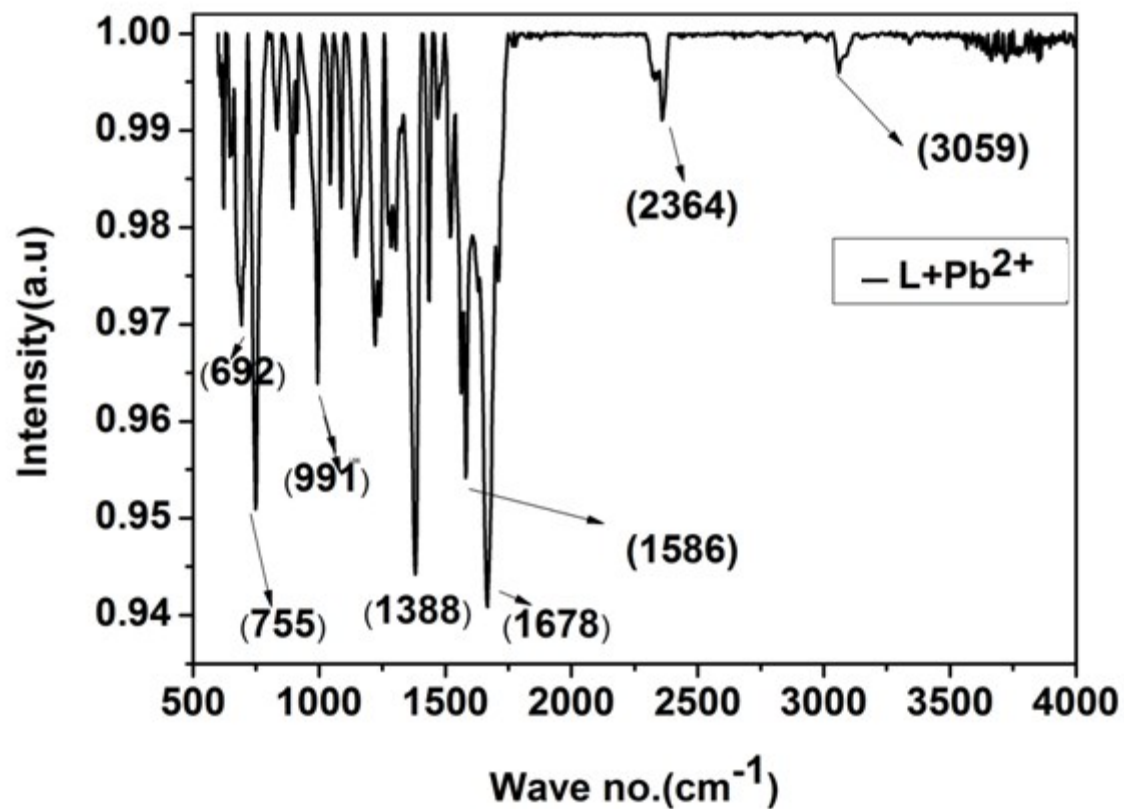

Fig. S9. FTIR spectra of L-Pb<sup>2+</sup> complex (2).

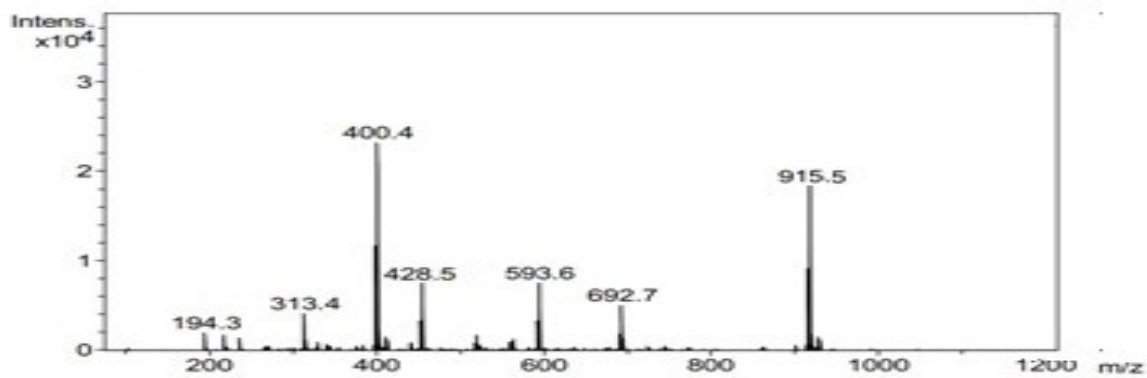

Fig. S10. ESI-mass spectra of L-Pb<sup>2+</sup> complex (2)

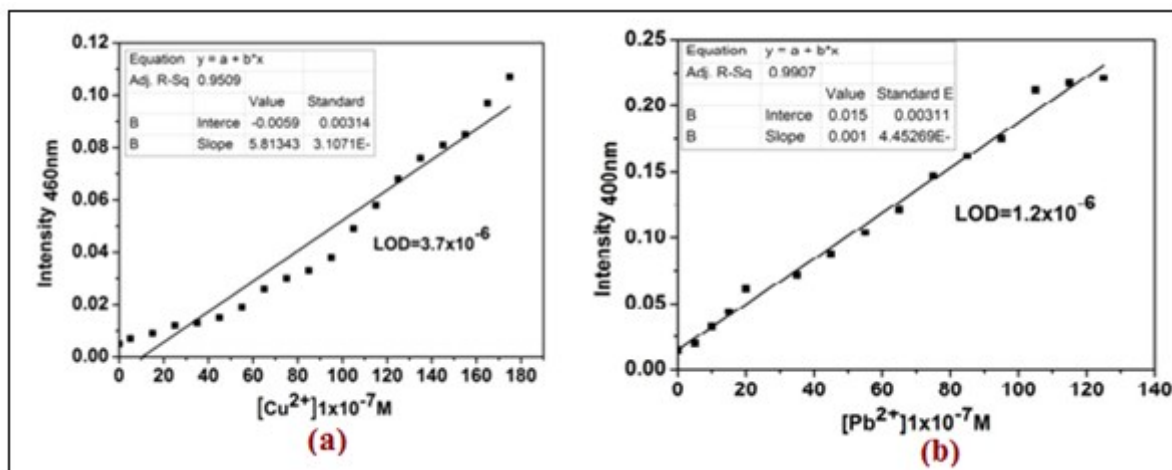

Fig. S11. Colorimetric Detection limits of L for (a) Cu<sup>2+</sup> and (b) Pb<sup>2+</sup>

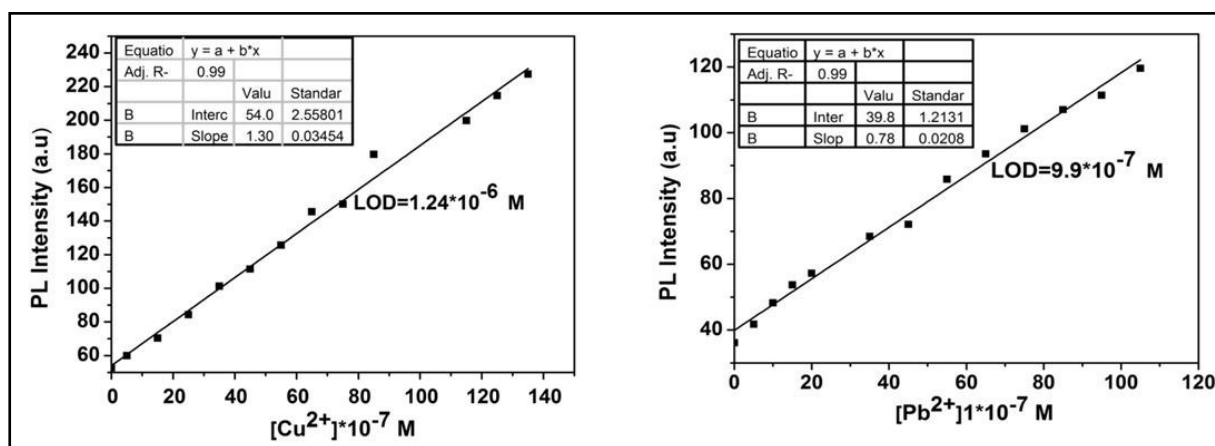

Fig.S12. Fluorometric Detection limits of L for (a) Cu<sup>2+</sup> and (b) Pb<sup>2+</sup>

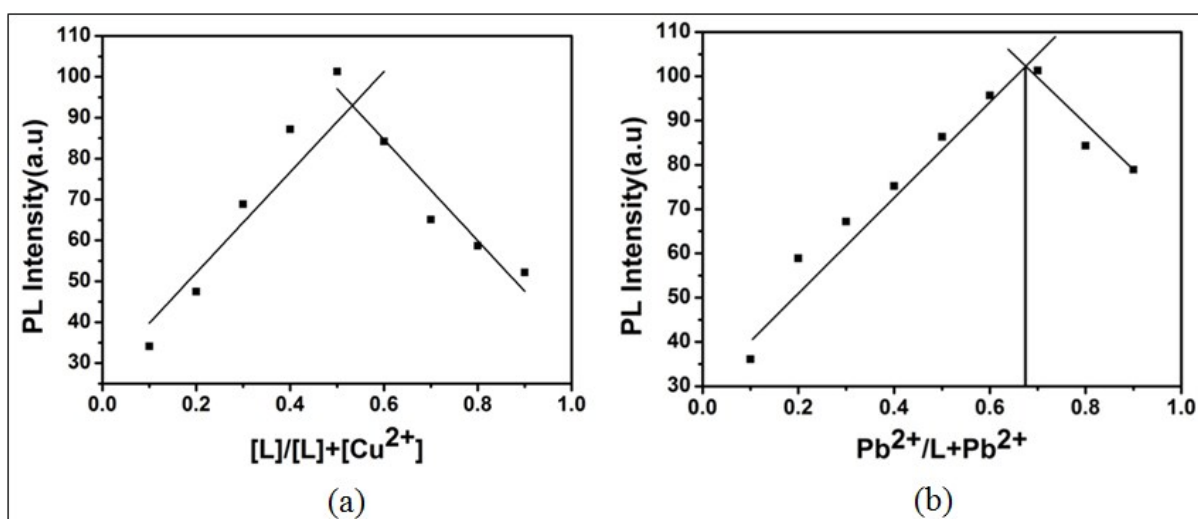

Fig. S13. Job's plot for (a) Cu<sup>2+</sup> and (b) Pb<sup>2+</sup>

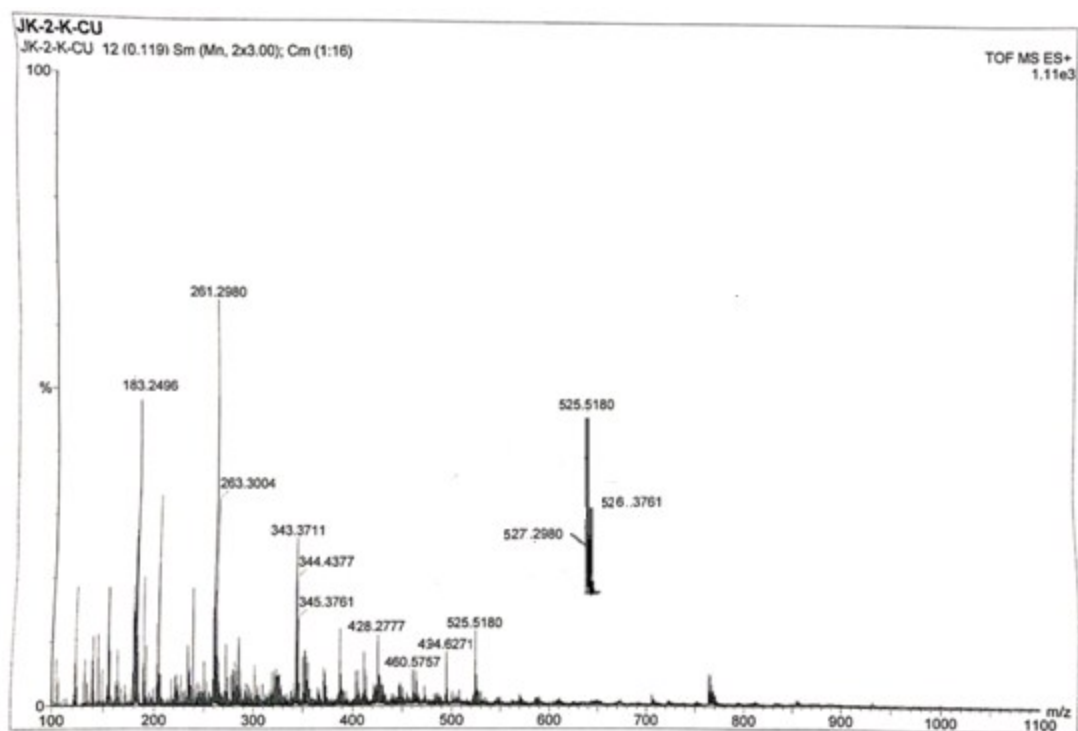

Fig. S14. ESI-mass spectra of L-Cu<sup>2+</sup> adduct

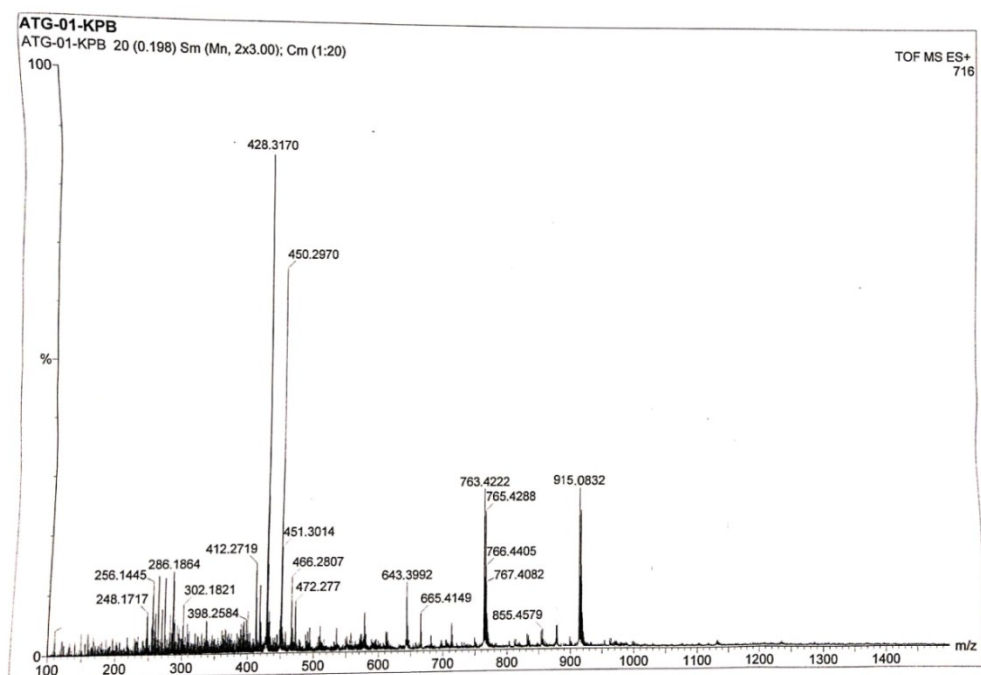

Fig. S15. ESI-mass spectra of L-Pb<sup>2+</sup> adduct



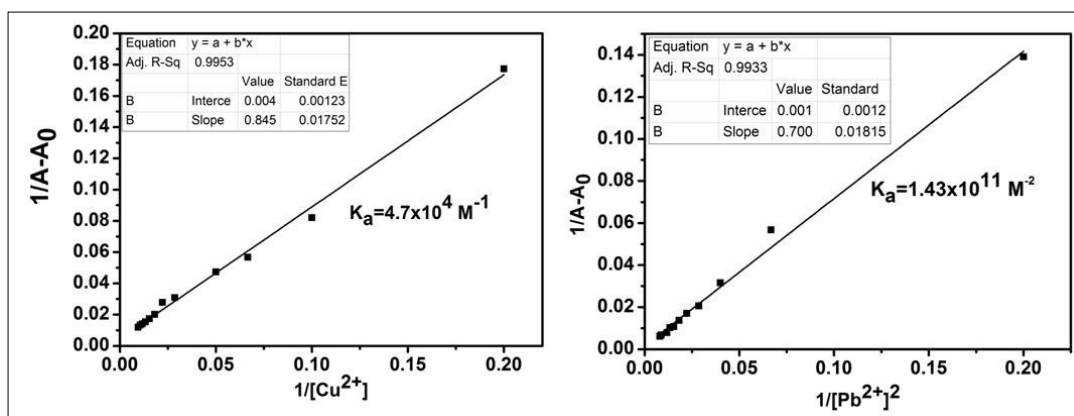

Fig.S16. Association constant of L-Cu<sup>2+</sup> and L-Pb<sup>2+</sup> complexes

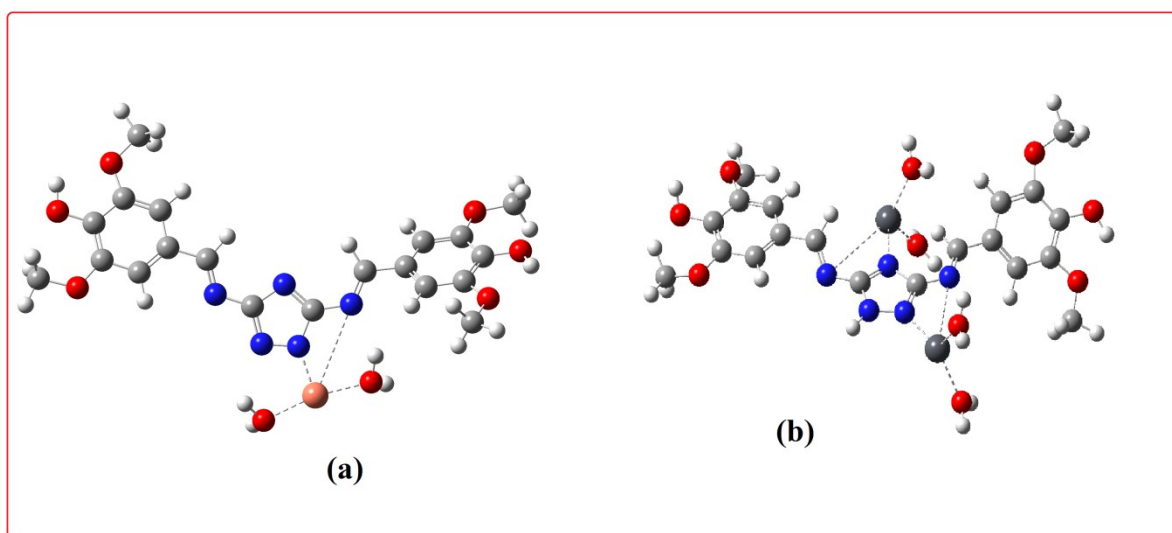

Fig.S17. DFT optimised structures of L-Cu<sup>2+</sup> complex (1) and L-Pb<sup>2+</sup> complex (2)

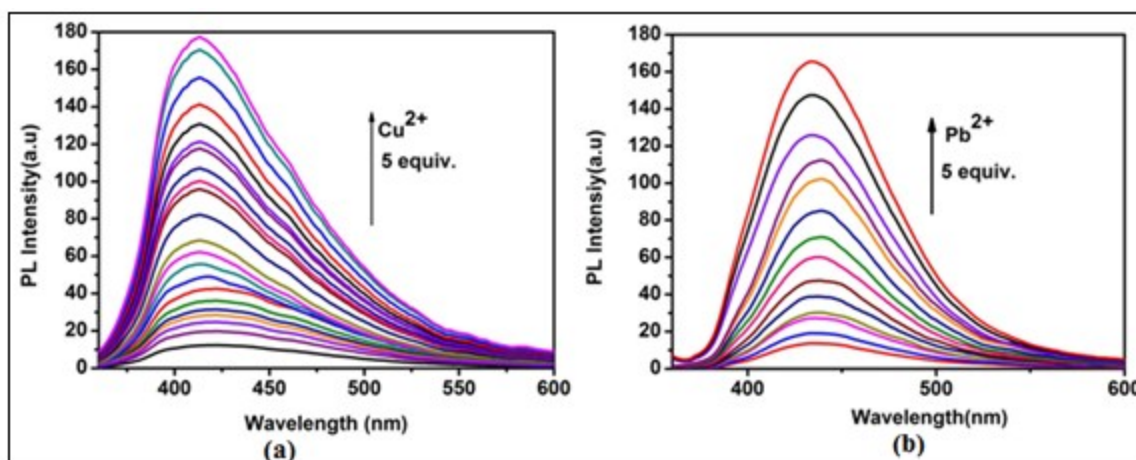

Fig. S18. In aqueous bovine serum albumin medium-fluorescence spectra of L in presence of 5 equiv. of (a) Cu<sup>2+</sup> and (b) Pb<sup>2+</sup>.
